# Supplementary material
Source: Research Square preprint supplement (doi:10.21203/rs.3.rs-8910823/v1)
Supplement: Supplementary file 1 [file aac662b19e058c7a523591d7.docx]

**Appendix**

**Table A1.** ANCOVA results for MADRS and HARS outcomes at the end of the study (Intention-to-treat analysis)

|  | **df** | **Adjusted between-group difference** | **F** | **95% CI** | **p** | **Partial η²** |
| --- | --- | --- | --- | --- | --- | --- |
| **MADRS** | | | | | | | |
| Biofeedback therapy | 1 | **1.94** | [0.098; 3.780] | 4.4 | **0.039** | 0.057 |
| Diagnosis | 2 | ⸻ | ⸻ | 0.885 | 0.417 | 0.024 |
| Antidepressant prescribed (yes vs no) | 1 | −0.53 | [−2.64; 1.58] | 0.25 | 0.62 | 0.001 |
| Anxiolytic prescribed (yes vs no) | 1 | **0.39** | [−1.66; 2.44] | 0.14 | 0.71 | 0.001 |
| Mood stabilizer prescribed (yes vs no) | 1 | 1.52 | [−0.81; 3.86] | 1.69 | 0.20 | 0.02 |
| Baseline MADRS | 1 | ⸻ | ⸻ | 10.16 | 0.001 | 0.12 |
| **HARS** | | | | | | | |
| Biofeedback therapy | 1 | **1.099** | [−0.709; 2.907] | 1.47 | 0.23 | 0.02 |
| Diagnosis | 2 | ⸻ | ⸻ | 0.98 | 0.380 | 0.026 |
| Antidepressant prescribed (yes vs no) | 1 | −1.162 | [−3.223; 0.900] | 1.261 | 0.265 | 0.017 |
| Anxiolytic prescribed (yes vs no) | 1 | 1.980 | [−0.058; 4.018] | 3.749 | 0.057 | 0.049 |
| Mood stabilizer prescribed (yes vs no) | 1 | −0.404 | [−2.685; 1.877] | 0.125 | 0.725 | 0.002 |
| Baseline HARS | 1 | ⸻ | ⸻ | 12.319 | **0.001** | 0.144 |

*Note -* N=80. MADRS scores at the second assessment point were specified as the dependent variable. All factors listed in the table were entered into a single model (“biofeedback therapy,” “diagnosis,” “antidepressant prescribed,” “anxiolytic prescribed,” and “mood stabilizer prescribed” as fixed factors; baseline MADRS or baseline HARS as the covariate). The “adjusted between-group difference” column reports the difference in the dependent variable (MADRS or HARS score at follow-up) between categories after adjustment for the other model variables. Partial η² represents the proportion of variance in the dependent variable explained by the predictor after accounting for the remaining predictors. The diagnosis variable had three categories: 1) unipolar depressions (F32 and F33); 2) bipolar spectrum disorders (F31 and F34); 3) anxiety disorders (F41 and F42).

**Table A2.** **Changes in MADRS and HARS scores over the course of the study across different diagnostic groups**

| **Diagnosis** | **N (baseline)** | Baseline Median (Q1–Q3) | N (endpoint) | Endpoint Median (Q1–Q3) | Change Score Median (Q1–Q3) | **H-statistic** | p |
| --- | --- | --- | --- | --- | --- | --- | --- |
| **MADRS** | | | | | | | |
| **Unipolar depression** | 34 | 17 (16–22) | 30 | 12 (9–14) | 6 (4–9) | 3.21 | 0.2 |
| **Bipolar spectrum** | 29 | 19 (16–22.5) | 26 | 10 (8–13) | 8 (5–13.5) |  |  |
| **Anxiety disorders** | 21 | 17 (16–21) | 18 | 10 (7–12) | 7 (5–12) |  |  |
| **HARS** | | | | | | | |
| **Unipolar depression** | 34 | 19 (17–24) | 30 | 11 (8–14) | 6 (4–9) | 2.88 | 0.24 |
| **Bipolar spectrum** | 29 | 19 (15–22.5) | 26 | 10 (8–14) | 8 (5–13.5) |  |  |
| **Anxiety disorders** | 21 | 21 (18–28) | 18 | 11 (8–13) | 7 (5–12) |  |  |

**Note – H and p are reported for the change score.**


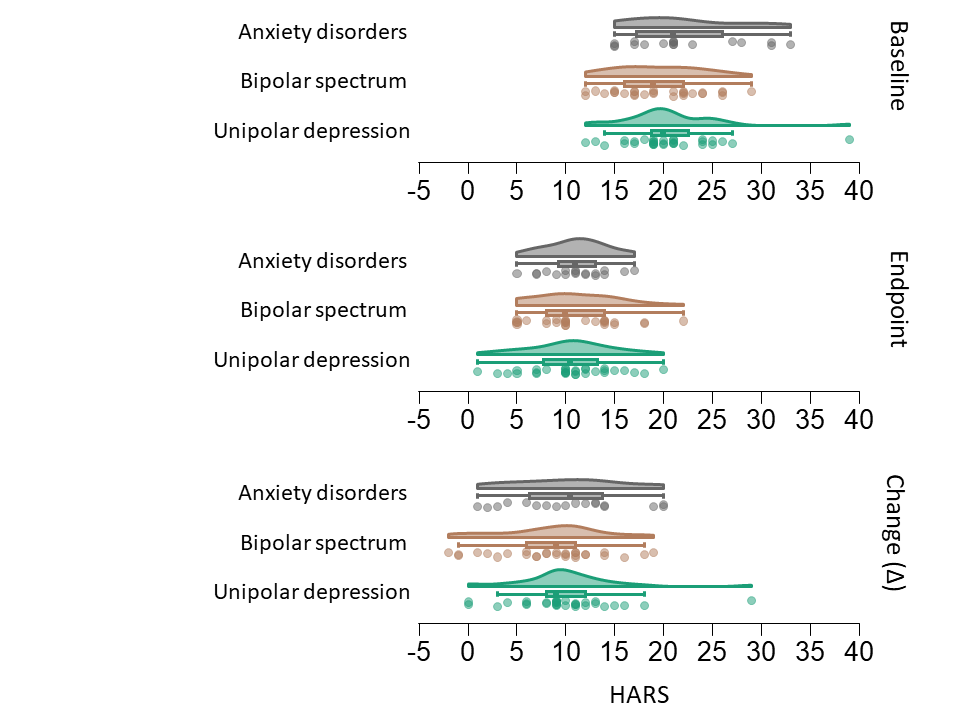
**Figure A1. Change in HARS scores over the course of the study across different diagnostic groups**


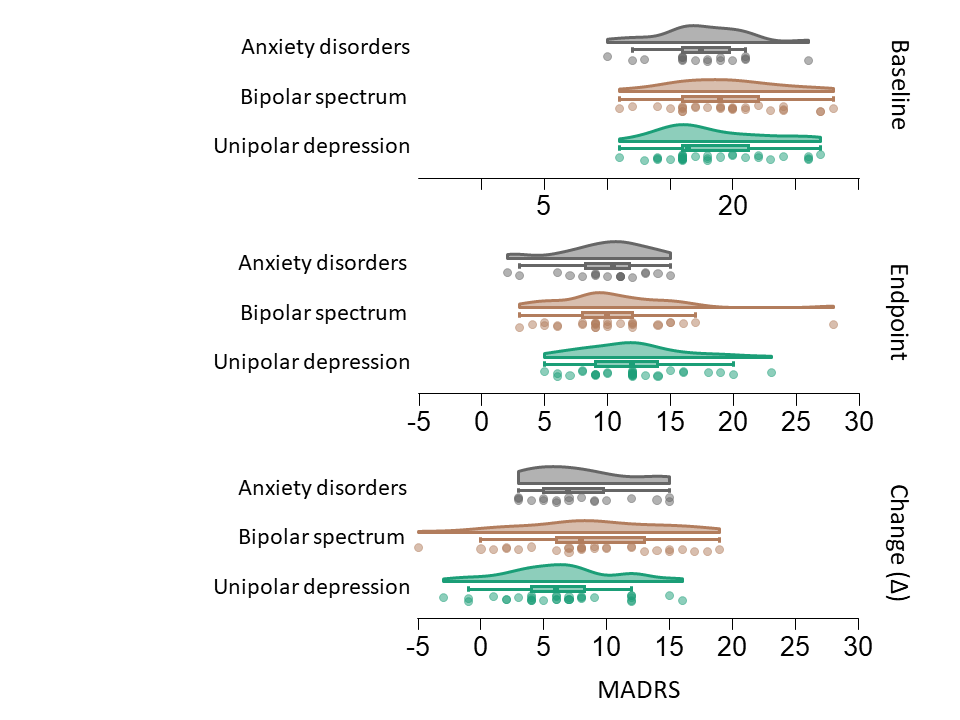
**Figure A2. Change in MADRS scores over the course of the study across different diagnostic groups**

**Table A3. Baseline characteristics of study completers and dropouts**

|  | **Completed** | **Withdrawn** | p |
| --- | --- | --- | --- |
| Total N | 74 | 6 | - |
| **N in the BFB group** | 41 (55%) | 6 (100%) | 0.039 |
| Age, median (Q1–Q3) | 27 (23–38.5) | 21 (20–45) | 0.48 |
| Female, n (%) | 33 (44.6%) | 4 (66%) | 0.4 |
| Illness duration, median (Q1–Q3) | 2.5 (1.5–4) | 2.5 (0.75–4) | 0.32 |
|  |  |  |  |
| Receiving an antidepressant, n (%) | 49 (66%) | 4 (66%) | 1.0 |
| Receiving an anxiolytic, n (%) | 44 (59%) | 1 (16%) | 0.07 |
| Receiving a mood stabilizer, n (%) | 37 (50%) | 2 (33%) | 0.67 |
|  |  |  |  |
| MADRS, median (Q1–Q3) | 18 (16–21) | 19.5 (16–22) | 0.5 |
| HARS, median (Q1–Q3) | 20 (16–24) | 16 (14–22) | 0.34 |
|  |  |  |  |
| Depressive episode (F32), n (%) | 12 (16%) | 1 (17%) | 0.97 |
| Recurrent depressive disorder (F33), n (%) | 18 (24%) | 2 (33%) | 0.63 |
|  |  |  |  |
| Mixed anxiety and depressive disorder (F41.2), n (%) | 12 (16%) | 1 (17%) | 1.0 |
| Generalized anxiety disorder (F41.1), n (%) | 6 (8%) | 0 | 0.63 |
|  |  |  |  |
| Bipolar disorder, current depressive episode, n (%) | 16 (23%) | 2 (33%) | 0.63 |
| Cyclothymia, n (%) | 10 (14%) | 0 | 0.35 |

Note - Baseline characteristics were summarized for study completers and dropouts. Continuous variables are reported as median (Q1; Q3). Categorical variables are presented as n (%), and between-group comparisons for categorical data were performed using Fisher’s exact test.

**
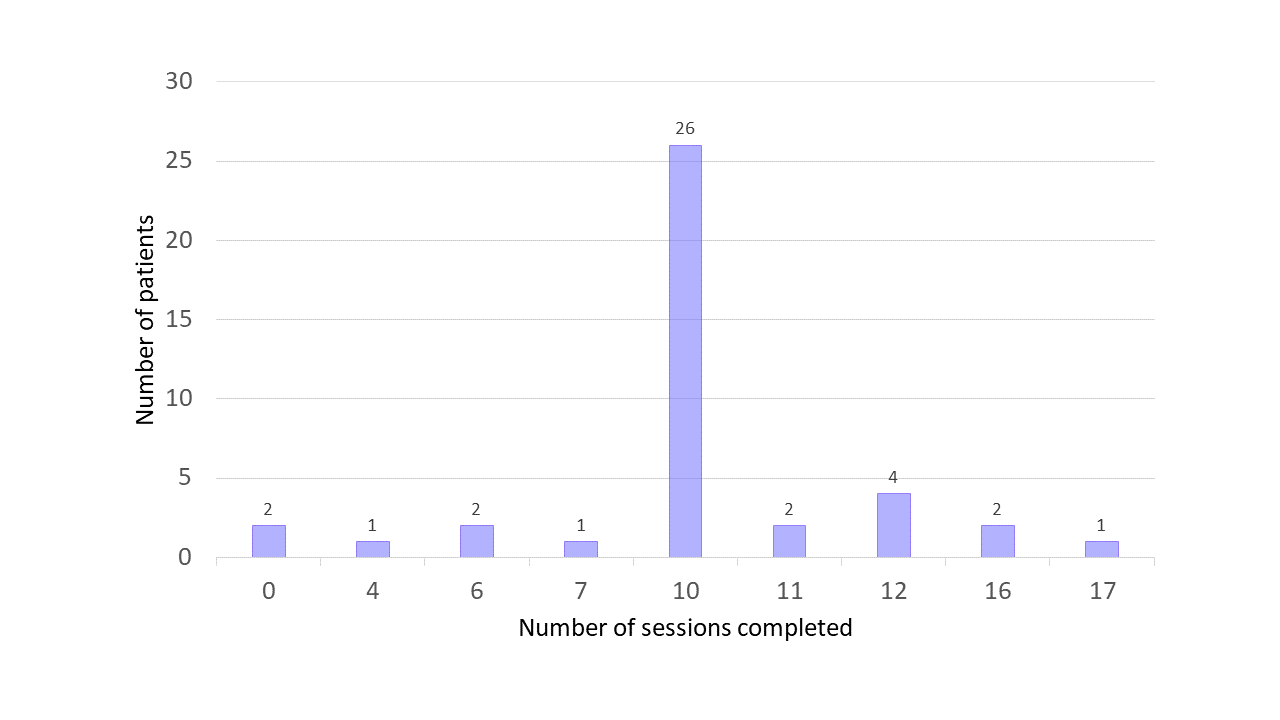
Figure A3.** Distribution of completed sessions

**
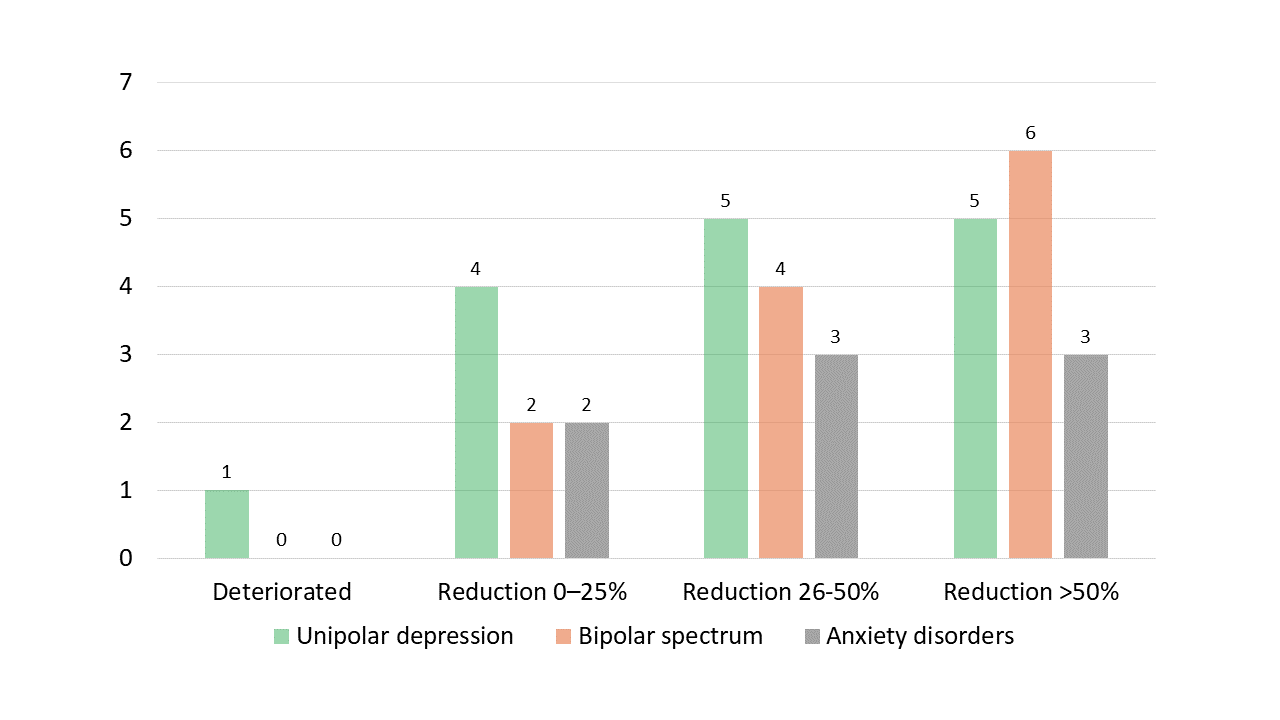
Figure A4. Percentage reduction in MADRS scores in the biofeedback therapy group
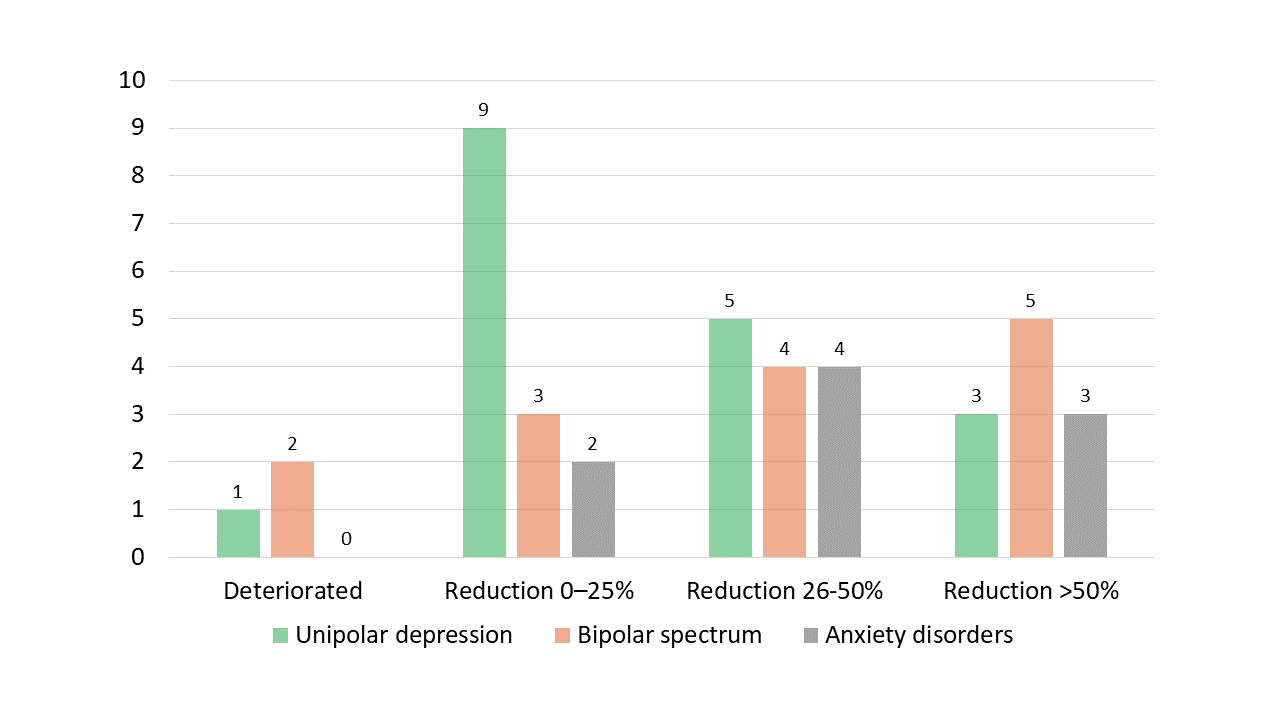
Figure A5. Percentage reduction in MADRS scores in the control group**
